# Supplementary material for: Dynamic Analysis of Integrated Signaling, Metabolic, and Regulatory Networks
Source: PLoS Comput Biol. 2008 May 23;4(5):e1000086. doi: 10.1371/journal.pcbi.1000086 (PMC2377155; doi:10.1371/journal.pcbi.1000086)
Supplement: Text S1 - Prototypic Integrated System — (0.06 MB PDF) [file pcbi.1000086.s001.pdf]

## TEXT S1: PROTOTYPIC INTEGRATED SYSTEM

In an effort to investigate the **integrated dynamic Flux Balance Analysis (idFBA)** framework, a prototypic integrated network was assembled and evaluated. The prototypic integrated network is illustrated in Figure 3. Network components and component interactions were typical of those observed in published reconstructions of signaling, metabolic, and transcriptional regulatory networks. Here we summarize the kinetic relationships for the network that were used to implement the kinetic model described in the manuscript. Specifically, Tables S1.1 and S1.2 present the kinetic equations and rate constants for the prototypic signaling network, respectively; and Tables S1.3 and S1.4 the kinetic equations and rate constants for the prototypic metabolic network, respectively. In addition, the ordinary differential equations for the signaling, metabolic, and regulatory networks are Equations 1 through 53, 54 through 66, and 67 through 69, respectively.

## REFERENCES

1. Lauffenburger DA, Linderman JJ (1993) Receptors: models for binding, trafficking, and signaling. New York: Oxford University Press. x, 365 p. p.
2. Schoeberl B, Eichler-Jonsson C, Gilles ED, Muller G (2002) Computational modeling of the dynamics of the MAP kinase cascade activated by surface and internalized EGF receptors. Nat Biotechnol 20: 370-375.
3. Klipp E, Nordlander B, Kruger R, Gennemark P, Hohmann S (2005) Integrative model of the response of yeast to osmotic shock. Nat Biotechnol 23: 975-982.

## FIGURE CAPTIONS

**Table S1.1.** Kinetic equations of the prototypic signaling network.

**Table S1.2.** Rate constants for the prototypic signaling network.

**Table S1.3.** Kinetic equations of the prototypic metabolic network.

**Table S1.4.** Rate constants for the prototypic metabolic network.

**Table S1.1.** Kinetic equations of the prototypic signaling network.

| Name          | Reaction                                                              | Kinetic Equation                        | Description     |
|---------------|-----------------------------------------------------------------------|-----------------------------------------|-----------------|
| $v_1^{S1}$    | $[L_1] + [R_1] \rightarrow [L_1R_1]$                                  | $k_1^{S1} [L_1][R_1]$                   | Binding         |
| $v_2^{S1}$    | $[L_1R_1] \rightarrow [L_1] + [R_1]$                                  | $k_2^{S1} [L_1R_1]$                     | Dissociation    |
| $v_3^{S1}$    | $[L_1R_1] \rightarrow [L_1R_{1int}]$                                  | $k_3^{S1} [L_1R_1]$                     | Internalization |
| $v_4^{S1}$    | $[L_1R_1] + [S_1] \rightarrow [L_1R_1 \cdot S_1]$                     | $k_4^{S1} [L_1R_1][S_1]$                | Association     |
| $v_5^{S1}$    | $[L_1R_1 \cdot S_1] + [ATP] \rightarrow [L_1R_1 \cdot S_1 \cdot ATP]$ | $k_5^{S1} [L_1R_1 \cdot S_1][ATP]$      | Association     |
| $v_6^{S1}$    | $[L_1R_1 \cdot S_1 \cdot ATP] \rightarrow [S_1p] + [ADP] + [L_1R_1]$  | $k_6^{S1} [L_1R_1 \cdot S_1 \cdot ATP]$ | Dissociation    |
| $v_7^{S1}$    | $[S_1p] + [T_1] \rightarrow [S_1p \cdot T_1]$                         | $k_7^{S1} [S_1p][T_1]$                  | Association     |
| $v_8^{S1}$    | $[S_1p \cdot T_1] + [ATP] \rightarrow [S_1p \cdot T_1 \cdot ATP]$     | $k_8^{S1} [S_1p \cdot T_1][ATP]$        | Association     |
| $v_9^{S1}$    | $[S_1p \cdot T_1 \cdot ATP] \rightarrow [S_1p] + [T_1p] + [ADP]$      | $k_9^{S1} [S_1p \cdot T_1 \cdot ATP]$   | Dissociation    |
| $v_{10}^{S1}$ | $[S_1p] \rightarrow [S_1] + [H_2O] + [P_i]$                           | $k_{10}^{S1} [S_1p]$                    | Hydrolyzation   |
| $v_{11}^{S1}$ | $[T_1p] \rightarrow [T_1] + [H_2O] + [P_i]$                           | $k_{11}^{S1} [T_1p]$                    | Hydrolyzation   |
| $v_{12}^{S1}$ | $[S_1p] + [IS_1] \rightarrow [IS_1 \cdot S_1p]$                       | $k_{12}^{S1} [S_1p][IS_1]$              | Inhibition      |
| $v_{13}^{S1}$ | $[IS_1 \cdot S_1p] \rightarrow [IS_1 \cdot S_1p_{lys}]$               | $k_{13}^{S1} [IS_1 \cdot S_1p]$         | Inhibition      |
| $v_1^{S1S2}$  | $[T_1] + [S_2p] \rightarrow [T_1 \cdot S_2p]$                         | $k_1^{S1S2} [T_1][S_2p]$                | Association     |
| $v_2^{S1S2}$  | $[T_1 \cdot S_2p] + [ATP] \rightarrow [T_1 \cdot S_2p \cdot ATP]$     | $k_2^{S1S2} [T_1 \cdot S_2p][ATP]$      | Association     |
| $v_3^{S1S2}$  | $[T_1 \cdot S_2p \cdot ATP] \rightarrow [T_1p] + [S_2p] + [ADP]$      | $k_3^{S1S2} [T_1 \cdot S_2p \cdot ATP]$ | Dissociation    |
| $s_2$         | $[T_2] + [S_3p] \rightarrow [T_2 \cdot S_3p]$                         | $k_1^{S2S3} [T_2][S_3p]$                | Association     |
| $v_2^{S2S3}$  | $[T_2 \cdot S_3p] + [ATP] \rightarrow [T_2 \cdot S_3p \cdot ATP]$     | $k_2^{S2S3} [T_2 \cdot S_3p][ATP]$      | Association     |
| $v_3^{S2S3}$  | $[T_2 \cdot S_3p \cdot ATP] \rightarrow [T_2p] + [S_3p] + [ADP]$      | $k_3^{S2S3} [T_2 \cdot S_3p \cdot ATP]$ | Dissociation    |
| $v_1^{S2}$    | $[L_2] + [R_2] \rightarrow [L_2R_2]$                                  | $k_1^{S2} [L_2][R_2]$                   | Binding         |
| $v_2^{S2}$    | $[L_2R_2] \rightarrow [L_2] + [R_2]$                                  | $k_2^{S2} [L_2R_2]$                     | Dissociation    |
| $v_3^{S2}$    | $[L_2R_2] \rightarrow [L_2R_{2int}]$                                  | $k_3^{S2} [L_2R_2]$                     | Internalization |
| $v_4^{S2}$    | $[L_2R_2] + [S_2] \rightarrow [L_2R_2 \cdot S_2]$                     | $k_4^{S2} [L_2R_2][S_2]$                | Association     |
| $v_5^{S2}$    | $[L_2R_2 \cdot S_2] + [ATP] \rightarrow [L_2R_2 \cdot S_2 \cdot ATP]$ | $k_5^{S2} [L_2R_2 \cdot S_2][ATP]$      | Association     |
| $v_6^{S2}$    | $[L_2R_2 \cdot S_2 \cdot ATP] \rightarrow [S_2p] + [ADP] + [L_2R_2]$  | $k_6^{S2} [L_2R_2 \cdot S_2 \cdot ATP]$ | Dissociation    |
| $v_7^{S2}$    | $[S_2p] + [T_2] \rightarrow [S_2p \cdot T_2]$                         | $k_7^{S2} [S_2p][T_2]$                  | Association     |
| $v_8^{S2}$    | $[S_2p \cdot T_2] + [ATP] \rightarrow [S_2p \cdot T_2 \cdot ATP]$     | $k_8^{S2} [S_2p \cdot T_2][ATP]$        | Association     |
| $v_9^{S2}$    | $[S_2p \cdot T_2 \cdot ATP] \rightarrow [S_2p] + [T_2p] + [ADP]$      | $k_9^{S2} [S_2p \cdot T_2 \cdot ATP]$   | Dissociation    |
| $v_{10}^{S2}$ | $[S_2p] \rightarrow [S_2] + [H_2O] + [P_i]$                           | $k_{10}^{S2} [S_2p]$                    | Hydrolyzation   |
| $v_{11}^{S2}$ | $[T_2p] \rightarrow [T_2] + [H_2O] + [P_i]$                           | $k_{11}^{S2} [T_2p]$                    | Hydrolyzation   |

|                |                                                                       |                                          |                 |
|----------------|-----------------------------------------------------------------------|------------------------------------------|-----------------|
| $v_{12}^{S_2}$ | $[S_2p] + [IS_2] \rightarrow [IS_2 \cdot S_2p]$                       | $k_{12}^{S_2} [S_2p][IS_2]$              | Inhibition      |
| $v_{13}^{S_2}$ | $[IS_2 \cdot S_2p] \rightarrow [IS_2 \cdot S_2p_{lys}]$               | $k_{13}^{S_2} [IS_2 \cdot S_2p]$         | Inhibition      |
| $v_1^{S_3}$    | $[L_3] + [R_3] \rightarrow [L_3R_3]$                                  | $k_1^{S_3} [L_3][R_3]$                   | Binding         |
| $v_2^{S_3}$    | $[L_3R_3] \rightarrow [L_3] + [R_3]$                                  | $k_2^{S_3} [L_3R_3]$                     | Dissociation    |
| $v_3^{S_3}$    | $[L_3R_3] \rightarrow [L_3R_{3int}]$                                  | $k_3^{S_3} [L_3R_3]$                     | Internalization |
| $v_4^{S_3}$    | $[L_3R_3] + [S_3] \rightarrow [L_3R_3 \cdot S_3]$                     | $k_4^{S_3} [L_3R_3][S_3]$                | Association     |
| $v_5^{S_3}$    | $[L_3R_3 \cdot S_3] + [ATP] \rightarrow [L_3R_3 \cdot S_3 \cdot ATP]$ | $k_5^{S_3} [L_3R_3 \cdot S_3][ATP]$      | Association     |
| $v_6^{S_3}$    | $[L_3R_3 \cdot S_3 \cdot ATP] \rightarrow [S_3p] + [ADP] + [L_3R_3]$  | $k_6^{S_3} [L_3R_3 \cdot S_3 \cdot ATP]$ | Dissociation    |
| $v_7^{S_3}$    | $[S_3p] + [T_3] \rightarrow [S_3p \cdot T_3]$                         | $k_7^{S_3} [S_3p][T_3]$                  | Association     |
| $v_8^{S_3}$    | $[S_3p \cdot T_3] + [ATP] \rightarrow [S_3p \cdot T_3 \cdot ATP]$     | $k_8^{S_3} [S_3p \cdot T_3][ATP]$        | Association     |
| $v_9^{S_3}$    | $[S_3p \cdot T_3 \cdot ATP] \rightarrow [S_3p] + [T_3p] + [ADP]$      | $k_9^{S_3} [S_3p \cdot T_3 \cdot ATP]$   | Dissociation    |
| $v_{10}^{S_3}$ | $[S_3p] \rightarrow [S_3] + [H_2O] + [P_i]$                           | $k_{10}^{S_3} [S_3p]$                    | Hydrolyzation   |
| $v_{11}^{S_3}$ | $[T_3p] \rightarrow [T_3] + [H_2O] + [P_i]$                           | $k_{11}^{S_3} [T_3p]$                    | Hydrolyzation   |
| $v_{12}^{S_3}$ | $[S_3p] + [IS_3] \rightarrow [IS_3 \cdot S_3p]$                       | $k_{12}^{S_3} [S_3p][IS_3]$              | Inhibition      |
| $v_{13}^{S_3}$ | $[IS_3 \cdot S_3p] \rightarrow [IS_3 \cdot S_3p_{lys}]$               | $k_{13}^{S_3} [IS_3 \cdot S_3p]$         | Inhibition      |

**Table S1.2.** Rate constants for the prototypic signaling network.

| Parameter       | Value   | Unit                        | Reference           | Parameter       | Value   | Unit                        | Reference           |
|-----------------|---------|-----------------------------|---------------------|-----------------|---------|-----------------------------|---------------------|
| $k_1^{S_1}$     | 3.0     | $[\frac{1}{\mu M \cdot s}]$ | [1], Table 2-1      | $k_2^{S_1}$     | 0.002   | $[\frac{1}{s}]$             | [1], Table 2-1      |
| $k_3^{S_1}$     | 0.001   | $[\frac{1}{s}]$             | [1], Fig. 3-7       | $k_4^{S_1}$     | 10      | $[\frac{1}{\mu M \cdot s}]$ | [2], $v_2$          |
| $k_5^{S_1}$     | 3.3     | $[\frac{1}{\mu M \cdot s}]$ | [2], $v_2$          | $k_6^{S_1}$     | 2.9     | $[\frac{1}{s}]$             | [2], $v_{47}$       |
| $k_7^{S_1}$     | 6.7     | $[\frac{1}{\mu M \cdot s}]$ | [2], $v_2$          | $k_8^{S_1}$     | 2.5     | $[\frac{1}{\mu M \cdot s}]$ | [2], $v_2$          |
| $k_9^{S_1}$     | 5.0     | $[\frac{1}{s}]$             | [2], $v_{12}$       | $k_{10}^{S_1}$  | 0.001   | $[\frac{1}{s}]$             | [3], $k_{-i}^{MAP}$ |
| $k_{11}^{S_1}$  | 0.001   | $[\frac{1}{s}]$             | [3], $k_{-i}^{MAP}$ | $k_{12}^{S_1}$  | 0.001   | $[\frac{1}{\mu M \cdot s}]$ | [1]                 |
| $k_{13}^{S_1}$  | 0.003   | $[\frac{1}{s}]$             | [1], Table 6-2      | $k_1^{S_1 S_2}$ | 4.2     | $[\frac{1}{\mu M \cdot s}]$ | [2], $v_2$          |
| $k_2^{S_1 S_2}$ | 5.0     | $[\frac{1}{\mu M \cdot s}]$ |                     | $k_3^{S_1 S_2}$ | 1.0     | $[\frac{1}{s}]$             |                     |
| $k_1^{S_2 S_3}$ | 5.0     | $[\frac{1}{\mu M \cdot s}]$ | [2], $v_2$          | $k_2^{S_2 S_3}$ | 4.0     | $[\frac{1}{\mu M \cdot s}]$ |                     |
| $k_3^{S_2 S_3}$ | 1.0     | $[\frac{1}{s}]$             |                     |                 |         |                             |                     |
| $k_1^{S_2}$     | 2.85    | $[\frac{1}{\mu M \cdot s}]$ | [1], Table 2-1      | $k_2^{S_2}$     | 0.0019  | $[\frac{1}{s}]$             | [1], Table 2-1      |
| $k_3^{S_2}$     | 0.00095 | $[\frac{1}{s}]$             | [1], Fig. 3-7       | $k_4^{S_2}$     | 9.5     | $[\frac{1}{\mu M \cdot s}]$ | [2], $v_2$          |
| $k_5^{S_2}$     | 3.1     | $[\frac{1}{\mu M \cdot s}]$ | [2], $v_2$          | $k_6^{S_2}$     | 2.7     | $[\frac{1}{s}]$             | [2], $v_{47}$       |
| $k_7^{S_2}$     | 6.3     | $[\frac{1}{\mu M \cdot s}]$ | [2], $v_2$          | $k_8^{S_2}$     | 2.3     | $[\frac{1}{\mu M \cdot s}]$ | [2], $v_2$          |
| $k_9^{S_2}$     | 4.75    | $[\frac{1}{s}]$             | [2], $v_{12}$       | $k_{10}^{S_2}$  | 0.00095 | $[\frac{1}{s}]$             | [3], $k_{-i}^{MAP}$ |
| $k_{11}^{S_2}$  | 0.00095 | $[\frac{1}{s}]$             | [3], $k_{-i}^{MAP}$ | $k_{12}^{S_2}$  | 0.00095 | $[\frac{1}{\mu M \cdot s}]$ | [1]                 |
| $k_{13}^{S_2}$  | 0.0028  | $[\frac{1}{s}]$             | [1], Table 6-2      |                 |         |                             |                     |
| $k_1^{S_3}$     | 3.15    | $[\frac{1}{\mu M \cdot s}]$ | [1], Table 2-1      | $k_2^{S_3}$     | 0.0021  | $[\frac{1}{s}]$             | [1], Table 2-1      |

|                |        |                             |                     |                |        |                             |                     |
|----------------|--------|-----------------------------|---------------------|----------------|--------|-----------------------------|---------------------|
| $k_3^{S_3}$    | 0.0011 | $[\frac{1}{s}]$             | [1], Fig. 3-7       | $k_4^{S_3}$    | 10.5   | $[\frac{1}{\mu M \cdot s}]$ | [2], $v_2$          |
| $k_5^{S_3}$    | 3.5    | $[\frac{1}{\mu M \cdot s}]$ | [2], $v_2$          | $k_6^{S_3}$    | 3.1    | $[\frac{1}{s}]$             | [2], $v_{47}$       |
| $k_7^{S_3}$    | 7.0    | $[\frac{1}{\mu M \cdot s}]$ | [2], $v_2$          | $k_8^{S_3}$    | 2.6    | $[\frac{1}{\mu M \cdot s}]$ | [2], $v_2$          |
| $k_9^{S_3}$    | 5.25   | $[\frac{1}{s}]$             | [2], $v_{12}$       | $k_{10}^{S_3}$ | 0.0011 | $[\frac{1}{s}]$             | [3], $k_{-i}^{MAP}$ |
| $k_{11}^{S_3}$ | 0.0012 | $[\frac{1}{s}]$             | [3], $k_{-i}^{MAP}$ | $k_{12}^{S_3}$ | 0.0012 | $[\frac{1}{\mu M \cdot s}]$ | [1]                 |
| $k_{13}^{S_3}$ | 0.0032 | $[\frac{1}{s}]$             | [1], Table 6-2      |                |        |                             |                     |

**Ordinary differential equations for the prototypic signaling network:**

$$\frac{d}{dt}[L_1] = -v_1^{S_1} + v_2^{S_1} \quad (1)$$

$$\frac{d}{dt}[R_1] = -v_1^{S_1} + v_2^{S_1} + v_{reg} - k_{deg}[R_1] \quad (2)$$

$$\frac{d}{dt}[L_1 R_1] = v_1^{S_1} - v_2^{S_1} - v_3^{S_1} - v_4^{S_1} + v_6^{S_1} \quad (3)$$

$$\frac{d}{dt}[L_1 R_{1_{int}}] = v_3^{S_1} \quad (4)$$

$$\frac{d}{dt}[S_1] = -v_4^{S_1} + v_{10}^{S_1} + v_{reg} - k_{deg}[S_1] \quad (5)$$

$$\frac{d}{dt}[L_1 R_1 \cdot S_1] = v_4^{S_1} - v_5^{S_1} \quad (6)$$

$$\frac{d}{dt}[L_1 R_1 \cdot S_1 \cdot ATP] = v_5^{S_1} - v_6^{S_1} \quad (7)$$

$$\frac{d}{dt}[S_1 p] = v_6^{S_1} - v_7^{S_1} + v_9^{S_1} - v_{10}^{S_1} - v_{12}^{S_1} \quad (8)$$

$$\frac{d}{dt}[T_1] = -v_7^{S_1} + v_{11}^{S_1} - v_1^{S_1 S_2} + v_{reg} - k_{deg}[T_1] \quad (9)$$

$$\frac{d}{dt}[T_1 p] = v_9^{S_1} - v_{11}^{S_1} + v_3^{S_1 S_2} \quad (10)$$

$$\frac{d}{dt}[S_1 p \cdot T_1] = v_7^{S_1} - v_8^{S_1} \quad (11)$$

$$\frac{d}{dt}[S_1 p \cdot T_1 \cdot ATP] = v_8^{S_1} - v_9^{S_1} \quad (12)$$

$$\frac{d}{dt}[IS_1] = -v_{12}^{S_1} + v_{reg} - k_{deg}[IS_1] \quad (13)$$

$$\frac{d}{dt}[IS_1 \cdot S_1 p] = v_{12}^{S_1} - v_{13}^{S_1} \quad (14)$$

$$\frac{d}{dt}[IS_1 \cdot S_1 p_{lys}] = v_{13}^{S_1} \quad (15)$$

$$\frac{d}{dt}[L_2] = -v_1^{S_2} + v_2^{S_2} \quad (16)$$

$$\frac{d}{dt}[R_2] = -v_1^{S_2} + v_2^{S_2} + v_{reg} - k_{deg}[R_2] \quad (17)$$

$$\frac{d}{dt}[L_2 R_2] = v_1^{S_2} - v_2^{S_2} - v_3^{S_2} - v_4^{S_2} + v_6^{S_2} \quad (18)$$

$$\frac{d}{dt}[L_2 R_{2int}] = v_3^{S_2} \quad (19)$$

$$\frac{d}{dt}[S_2] = -v_4^{S_2} + v_{10}^{S_2} + v_{reg} - k_{deg}[S_2] \quad (20)$$

$$\frac{d}{dt}[L_2 R_2 \cdot S_2] = v_4^{S_2} - v_5^{S_2} \quad (21)$$

$$\frac{d}{dt}[L_2 R_2 \cdot S_2 \cdot ATP] = v_5^{S_2} - v_6^{S_2} \quad (22)$$

$$\frac{d}{dt}[S_2 p] = v_6^{S_2} - v_7^{S_2} + v_9^{S_2} - v_{10}^{S_2} - v_{12}^{S_2} - v_1^{S_1 S_2} + v_3^{S_1 S_2} \quad (23)$$

$$\frac{d}{dt}[T_2] = -v_7^{S_2} + v_{11}^{S_2} + v_{reg} - k_{deg}[T_2] \quad (24)$$

$$\frac{d}{dt}[T_2 p] = v_9^{S_2} - v_{11}^{S_2} \quad (25)$$

$$\frac{d}{dt}[S_2 p \cdot T_2] = v_7^{S_2} - v_8^{S_2} \quad (26)$$

$$\frac{d}{dt}[S_2 p \cdot T_2 \cdot ATP] = v_8^{S_2} - v_9^{S_2} \quad (27)$$

$$\frac{d}{dt}[IS_2] = -v_{12}^{S_2} + v_{reg} - k_{deg}[IS_2] \quad (28)$$

$$\frac{d}{dt}[IS_2 \cdot S_2 p] = v_{12}^{S_2} - v_{13}^{S_2} \quad (29)$$

$$\frac{d}{dt}[IS_2 \cdot S_2 p_{lys}] = v_{13}^{S_2} \quad (30)$$

$$\frac{d}{dt}[L_3] = -v_1^{S_3} + v_2^{S_3} \quad (31)$$

$$\frac{d}{dt}[R_3] = -v_1^{S_3} + v_2^{S_3} + v_{reg} - k_{deg}[R_3] \quad (32)$$

$$\frac{d}{dt}[L_3 R_3] = v_1^{S_3} - v_2^{S_3} - v_3^{S_3} - v_4^{S_3} + v_6^{S_3} \quad (33)$$

$$\frac{d}{dt}[L_3 R_{3_{int}}] = v_3^{S_3} \quad (34)$$

$$\frac{d}{dt}[S_3] = -v_4^{S_3} + v_{10}^{S_3} + v_{reg} - k_{deg}[S_3] \quad (35)$$

$$\frac{d}{dt}[L_3 R_3 \cdot S_3] = v_4^{S_3} - v_5^{S_3} \quad (36)$$

$$\frac{d}{dt}[L_3 R_3 \cdot S_3 \cdot ATP] = v_5^{S_3} - v_6^{S_3} \quad (37)$$

$$\frac{d}{dt}[S_3 p] = v_6^{S_3} - v_7^{S_3} + v_9^{S_3} - v_{10}^{S_3} - v_{12}^{S_3} - v_1^{S_2 S_3} + v_3^{S_2 S_3} \quad (38)$$

$$\frac{d}{dt}[T_3] = -v_7^{S_3} + v_{11}^{S_3} + v_{reg} - k_{deg}[T_3] \quad (39)$$

$$\frac{d}{dt}[T_3 p] = v_9^{S_3} - v_{11}^{S_3} \quad (40)$$

$$\frac{d}{dt}[S_3 p \cdot T_3] = v_7^{S_3} - v_8^{S_3} \quad (41)$$

$$\frac{d}{dt}[S_3 p \cdot T_3 \cdot ATP] = v_8^{S_3} - v_9^{S_3} \quad (42)$$

$$\frac{d}{dt}[IS_3] = -v_{12}^{S_3} + v_{reg} - k_{deg}[IS_3] \quad (43)$$

$$\frac{d}{dt}[IS_3 \cdot S_3 p] = v_{12}^{S_3} - v_{13}^{S_3} \quad (44)$$

$$\frac{d}{dt}[IS_3 \cdot S_3 p_{lys}] = v_{13}^{S_3} \quad (45)$$

$$\frac{d}{dt}[T_1 \cdot S_2 p] = v_1^{S_1 S_2} - v_2^{S_1 S_2} \quad (46)$$

$$\frac{d}{dt}[T_1 \cdot S_2 p \cdot ATP] = v_2^{S_1 S_2} - v_3^{S_1 S_2} \quad (47)$$

$$\frac{d}{dt}[T_2 \cdot S_3 p] = v_1^{S_2 S_3} - v_2^{S_2 S_3} \quad (48)$$

$$\frac{d}{dt}[T_2 \cdot S_3 p \cdot ATP] = v_2^{S_2 S_3} - v_3^{S_2 S_3} \quad (49)$$

$$\frac{d}{dt}[H_2 O] = v_{10}^{S_1} + v_{11}^{S_1} + v_{10}^{S_2} + v_{11}^{S_2} + v_{10}^{S_3} + v_{11}^{S_3} \quad (50)$$

$$\frac{d}{dt}[P_i] = v_{10}^{S_1} + v_{11}^{S_1} + v_{10}^{S_2} + v_{11}^{S_2} + v_{10}^{S_3} + v_{11}^{S_3} \quad (51)$$

$$\frac{d}{dt}[ATP] = \frac{-v_5^{S_1} - v_8^{S_1} - v_5^{S_2} - v_8^{S_2} - v_5^{S_3} - v_8^{S_3} - v_2^{S_1S_2} - v_2^{S_2S_3}}{1000} - v_2^m - v_3^m + 2v_6^m - 5v_8^m - v_9^m + 3v_{11}^m - v_{13}^m \quad (52)$$

$$\frac{d}{dt}[ADP] = \frac{v_6^{S_1} + v_9^{S_1} + v_6^{S_2} + v_9^{S_2} + v_6^{S_3} + v_9^{S_3} + v_3^{S_1S_2} + v_3^{S_2S_3}}{1000} + v_2^m + v_3^m - 2v_6^m + 5v_8^m + v_9^m - 3v_{11}^m + v_{13}^m \quad (53)$$

**Table S1.3.** Kinetic equations of the prototypic metabolic network.

| Name       | Reaction                                                                   | Kinetic Equation                                                                                                                                                                                            |
|------------|----------------------------------------------------------------------------|-------------------------------------------------------------------------------------------------------------------------------------------------------------------------------------------------------------|
| $v_1^m$    | $[Carbon] \rightarrow [A]$                                                 | $S_u \cdot [Biomass]$                                                                                                                                                                                       |
| $v_2^m$    | $[A] + [ATP] \rightarrow [B] + [ADP]$                                      | $\frac{k_2^m}{1 + \frac{k_{21}^m}{[ATP]} \left(1 + \frac{[ADP]}{k_{22}^m}\right) + \frac{k_{23}^m}{[A]} + \frac{k_{21}^m}{[ATP]} \cdot \frac{k_{23}^m}{[A]} \cdot \left(1 + \frac{[ADP]}{k_{22}^m}\right)}$ |
| $v_3^m$    | $[B] + [ATP] \rightarrow [C] + [ADP]$                                      | $k_3^m \frac{[ATP]}{k_{31}^m + [ATP]} \frac{[B]}{k_{32}^m + [B]}$                                                                                                                                           |
| $v_4^m$    | $[C] \rightarrow [D] + [E]$                                                | $k_4^m \frac{\left([C] - \frac{[D][E]}{K_4^m}\right)}{k_{41}^m + [C] + \frac{k_{42}^m[D]}{K_4^m k_{43}^m} + \frac{k_{44}^m[E]}{K_4^m k_{43}^m} + \frac{[C][D]}{K_{41}^m} + \frac{[D][E]}{K_4^m k_{43}^m}}$  |
| $v_5^m$    | $[D] \rightarrow [E]$                                                      | $-k_5^m \frac{[E] - \frac{[D]}{K_5^m}}{k_{51}^m \left(1 + \frac{[D]}{k_{52}^m}\right) + [E]}$                                                                                                               |
| $v_6^m$    | $[D] + 2[ADP] + [NAD] \rightarrow [G] + 2[ATP] + [NADH]$                   | $k_6^m [D][NAD][ADP]$                                                                                                                                                                                       |
| $v_7^m$    | $[G] + [NADH] \rightarrow [H_2] + [NAD]$                                   | $k_7^m \frac{[G]}{k_{71}^m + [G]} \frac{[NADH]}{k_{72}^m + [NADH]}$                                                                                                                                         |
| $v_8^m$    | $1.5[F] + 10[G] + 2[H_1] + 2[H_2] + 5[ATP] \rightarrow [Biomass] + 5[ADP]$ | $k_8^m \frac{[G]}{k_{81}^m + [G]} \frac{[ATP]}{k_{82}^m + [ATP]} \frac{[F]}{k_{83}^m + [F]} \frac{[H_1]}{k_{84}^m + [H_1]} \frac{[H_2]}{k_{85}^m + [H_2]}$                                                  |
| $v_9^m$    | $0.8[B] + [ATP] \rightarrow [H_1] + [ADP]$                                 | $k_9^m \frac{[B]}{k_{91}^m + [B]} \frac{[ATP]}{k_{92}^m + [ATP]}$                                                                                                                                           |
| $v_{10}^m$ | $[E] + [NADH] \rightarrow [F] + [NAD]$                                     | $k_{10}^m \frac{[E]}{k_{101}^m + [E]} \frac{[NADH]}{k_{102}^m + [NADH]}$                                                                                                                                    |
| $v_{11}^m$ | $3[ADP] + [NADH] \rightarrow 3[ATP] + [NAD]$                               | $k_{11}^m \frac{[NADH][ADP]}{k_{111}^m + [ADP]}$                                                                                                                                                            |
| $v_{12}^m$ | $[NAD] \rightarrow [NADH]$                                                 | $k_{12}^m [NAD]$                                                                                                                                                                                            |
| $v_{13}^m$ | $[ATP] \rightarrow [ADP]$                                                  | $k_{13}^m \frac{[ATP]}{k_{131}^m + [ATP]}$                                                                                                                                                                  |

**Table S1.4.** Rate constants of the prototypic metabolic network.

| Parameter   | Value  | Unit                    | Reference     | Parameter   | Value  | Unit                     | Reference     |
|-------------|--------|-------------------------|---------------|-------------|--------|--------------------------|---------------|
| $k_2^m$     | 1.77   | $[\frac{mM}{s}]$        | [3], Eq. 5.15 | $k_{21}^m$  | 0.2    | $[mM]$                   | [3], Eq. 5.15 |
| $k_{22}^m$  | 1.2    | $[mM]$                  | [3], Eq. 5.15 | $k_{23}^m$  | 0.2    | $[mM]$                   | [3], Eq. 5.15 |
| $k_3^m$     | 0.895  | $[\frac{mM}{s}]$        | [3], Eq. 5.16 | $k_{31}^m$  | 0.01   | $[mM]$                   | [3], Eq. 5.16 |
| $k_{32}^m$  | 0.012  | $[mM]$                  | [3], Eq. 5.16 | $k_4^m$     | 1867.4 | $[\frac{mM}{s}]$         | [3], Eq. 5.17 |
| $K_4^m$     | 0.81   | $[mM]$                  | [3], Eq. 5.17 | $k_{41}^m$  | 0.054  | $[mM]$                   | [3], Eq. 5.17 |
| $k_{42}^m$  | 2.0    | $[mM]$                  | [3], Eq. 5.17 | $k_{43}^m$  | 5.0    |                          | [3], Eq. 5.17 |
| $k_{44}^m$  | 2.0    | $[mM]$                  | [3], Eq. 5.17 | $K_{41}^m$  | 10.0   | $[mM]$                   | [3], Eq. 5.17 |
| $k_5^m$     | 190    | $[\frac{mM}{s}]$        | [3], Eq. 5.18 | $K_5^m$     | 0.045  |                          | [3], Eq. 5.18 |
| $k_{51}^m$  | 0.38   | $[mM]$                  | [3], Eq. 5.18 | $k_{52}^m$  | 0.064  | $[mM]$                   | [3], Eq. 5.18 |
| $k_6^m$     | 45.127 | $[\frac{1}{mM^2 s}]$    | [3], Eq. 5.19 | $k_7^m$     | 1.5    | $[\frac{mM}{s}]$         | [3], Eq. 5.21 |
| $k_{71}^m$  | 1.2    | $[mM]$                  | [3], Eq. 5.21 | $k_{72}^m$  | 0.6    | $[mM]$                   | [3], Eq. 5.21 |
| $k_8^m$     | 0.8090 | $[\frac{g}{l \cdot s}]$ | [3], Eq. 5.22 | $k_{81}^m$  | 0.001  | $[mM]$                   | [3], Eq. 5.22 |
| $k_{82}^m$  | 0.5    | $[mM]$                  | [3], Eq. 5.22 | $k_{83}^m$  | 0.01   | $[mM]$                   | [3], Eq. 5.22 |
| $k_{84}^m$  | 0.05   | $[mM]$                  | [3], Eq. 5.22 | $k_{85}^m$  | 1.0    | $[mM]$                   | [3], Eq. 5.22 |
| $k_9^m$     | 0.4    | $[\frac{mM}{s}]$        | [3], Eq. 5.23 | $k_{91}^m$  | 0.01   | $[mM]$                   | [3], Eq. 5.23 |
| $k_{92}^m$  | 0.01   | $[mM]$                  | [3], Eq. 5.23 | $k_{10}^m$  | 7.15   | $[\frac{1}{mM \cdot s}]$ | [3], Eq. 5.24 |
| $k_{101}^m$ | 0.1    | $[mM]$                  | [3], Eq. 5.24 | $k_{102}^m$ | 0.6    | $[mM]$                   | [3], Eq. 5.24 |
| $k_{11}^m$  | 384    | $[s^{-1}]$              | [3], Eq. 5.27 | $k_{111}^m$ | 0.42   | $[mM]$                   | [3], Eq. 5.27 |
| $k_{12}^m$  | 1.12   | $[s^{-1}]$              | [3], Eq. 5.28 | $k_{13}^m$  | 99.8   | $[\frac{mM}{s}]$         | [3], Eq. 5.29 |
| $k_{131}^m$ | 5.0    | $[mM]$                  | [3], Eq. 5.29 |             |        |                          |               |

**Ordinary differential equations for the prototypic metabolic network:**

$$\frac{d}{dt}[A] = v_1^m - v_2^m \quad (54)$$

$$\frac{d}{dt}[B] = v_2^m - v_3^m - 0.8v_9^m \quad (55)$$

$$\frac{d}{dt}[C] = v_3^m - v_4^m \quad (56)$$

$$\frac{d}{dt}[D] = v_4^m - v_5^m - v_6^m \quad (57)$$

$$\frac{d}{dt}[E] = v_4^m + v_5^m - v_{10}^m \quad (58)$$

$$\frac{d}{dt}[F] = v_{10}^m - 1.5v_8^m \quad (59)$$

$$\frac{d}{dt}[G] = v_6^m - v_7^m - 10v_8^m \quad (60)$$

$$\frac{d}{dt}[H_1] = v_9^m - 2v_8^m - 0.371v_{reg} \quad (61)$$

$$\frac{d}{dt}[H_2] = v_7^m - 2v_8^m - 0.556v_{reg} \quad (62)$$

$$\frac{d}{dt}[NADH] = v_6^m - v_7^m - v_{10}^m - v_{11}^m + v_{12}^m \quad (63)$$

$$\frac{d}{dt}[NAD] = -\frac{d}{dt}[NADH] \quad (64)$$

$$\frac{d}{dt}[Biomass] = v_8^m \quad (65)$$

$$\frac{d}{dt}[Carbon] = -v_1^m \quad (66)$$

**Ordinary differential equations for the prototypic regulatory network:**

$$v_{reg} = k_{poly} [H_1][H_2], k_{poly} = 10^{-4} \left[ \frac{1}{\mu M \cdot s} \right] \quad (67)$$

$$v_{deg} = k_{deg} [Protein], k_{deg} = 10^{-3} \left[ \frac{1}{s} \right] \quad (68)$$

$$\frac{d}{dt} [Protein] = v_{reg} - v_{deg} \quad (69)$$
